# Supplementary material
Source: PubMed Central journal article supplement (PMC3483052)
Supplement: Supp_Fig.pdf [file Supp_Fig.pdf]

## Supplementary Data

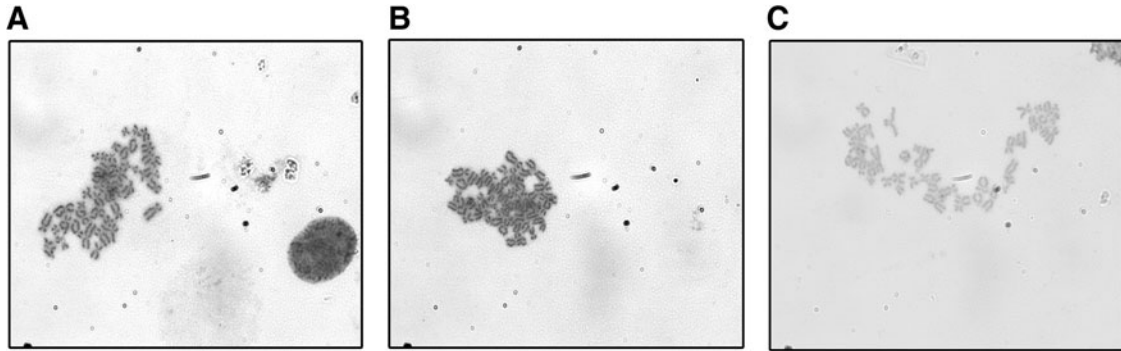

**SUPPLEMENTARY FIG. S1.** (A, B, C). Represents the different karyotype images of SV40 endothelial progenitor cell at population doubling 100.
